# Supplementary material for: A low-cost, high-sensitivity 3D printed fluorescence detector
Source: Royal Society of Chemistry journal article supplement (doi:10.1039/d4an01378f), 2025-01-01
Supplement: d4an01378f1.zip [file d4an01378f1.zip]

## Side View

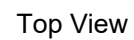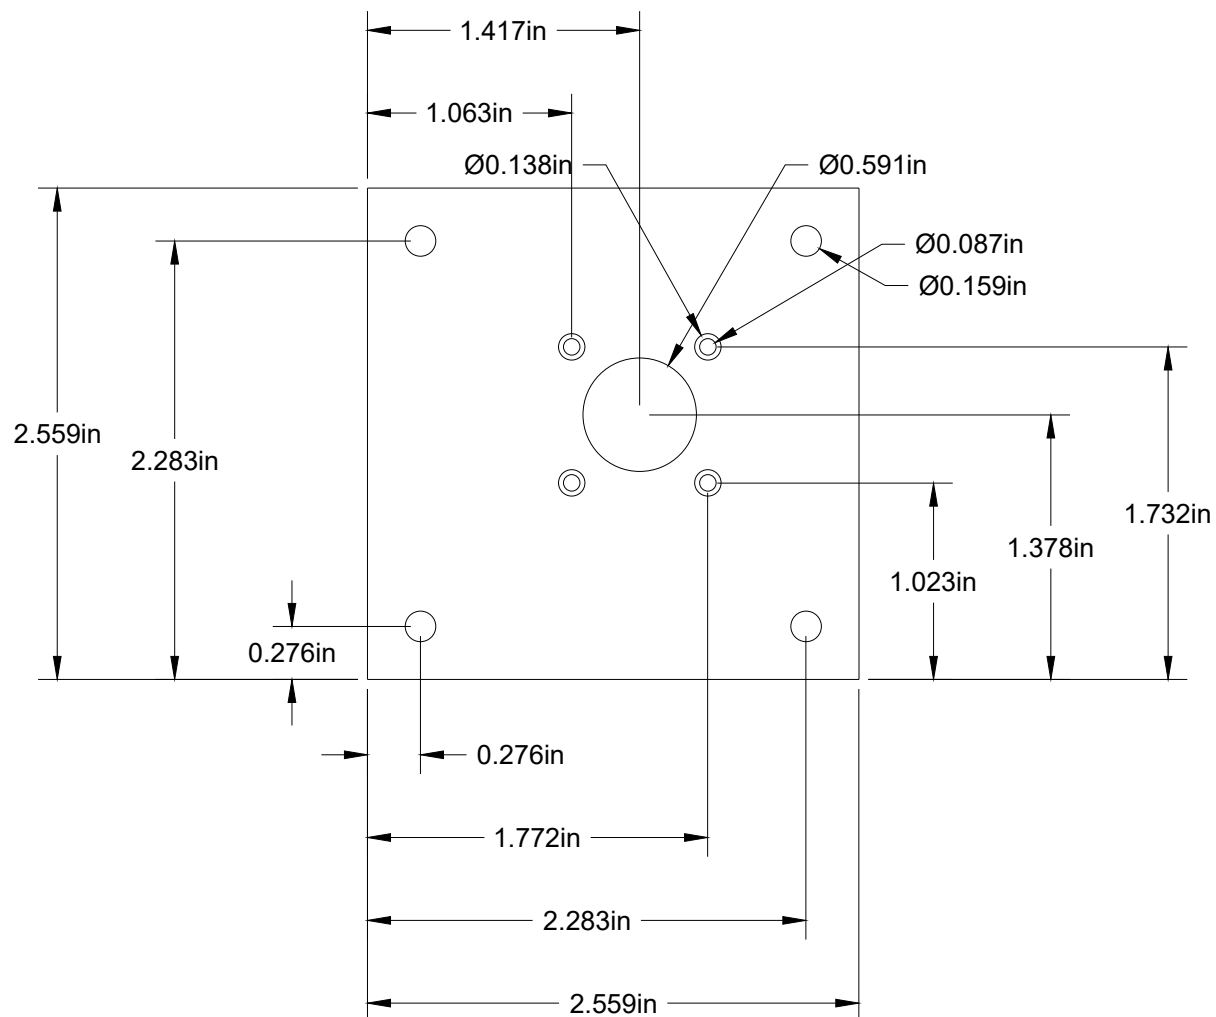

|                                                                                     |                              |                                  |        |            |
|-------------------------------------------------------------------------------------|------------------------------|----------------------------------|--------|------------|
|  | Created by: Robyn Snow NA    | Approved by: GE NA               |        |            |
|                                                                                     | Project Title: 3DFL Detector | Document status: final, complete |        |            |
| Dept. RD                                                                            | Part Name: PMT Mount         | Dwg. No. 1                       | Rev. 1 | Scale: 1:1 |
| Technical Ref. 1                                                                    |                              | Date of Issue: NA                |        | Sheet: 1   |
