# Supplementary material for: A low-cost, high-sensitivity 3D printed fluorescence detector
Source: Royal Society of Chemistry journal article supplement (doi:10.1039/d4an01378f), 2025-01-01
Supplement: d4an01378f1.zip [file d4an01378f1.zip]

3DFL Detector Main Body (Optical Block)

Top View

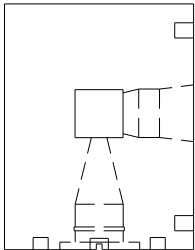

PMT Side View

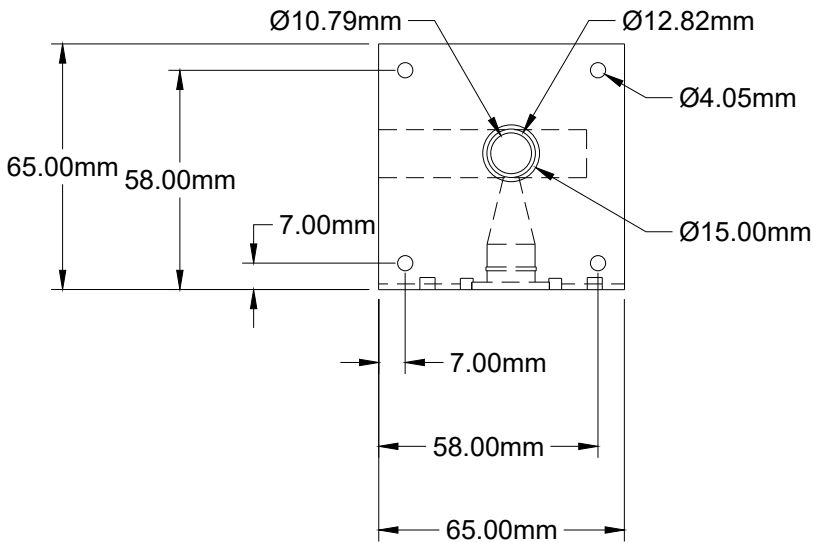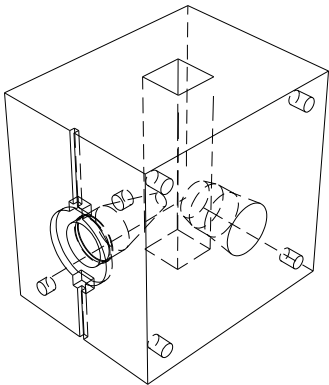

PMT 3D View

LED Side 3D View

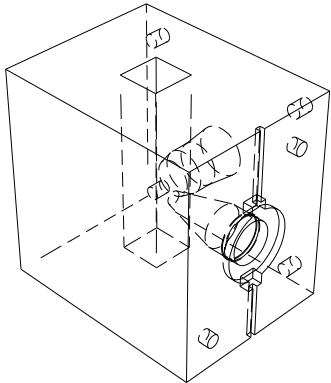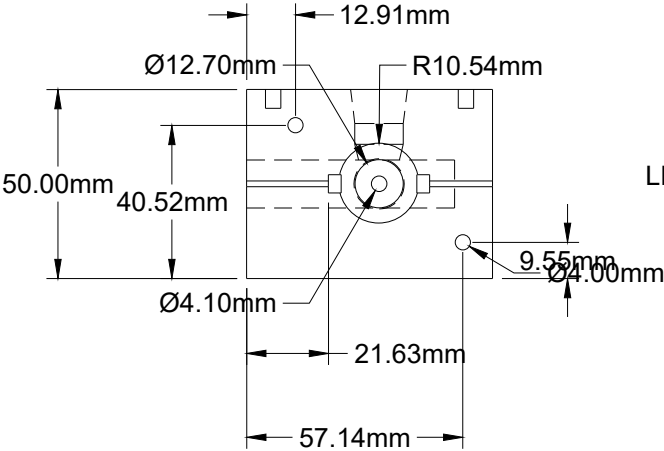

LED Side View

|                                                                                     |                        |                                      |                 |                   |        |                 |
|-------------------------------------------------------------------------------------|------------------------|--------------------------------------|-----------------|-------------------|--------|-----------------|
|  | Created by: Robyn Snow | NA                                   | Approved by: GE |                   |        | NA              |
|                                                                                     | Project Title:         | 3DFL Detector                        |                 | Document status:  |        | final, complete |
|                                                                                     | Dept. RD               | Part Name: Main Body (optical block) |                 | Dwg. No. 1        | Rev. 1 | Scale: 1:2      |
|                                                                                     | Technical Ref. 1       |                                      |                 | Date of Issue: NA |        | Sheet: 1        |
